# Supplementary material
Source: PubMed Central journal article supplement (PMC515089)

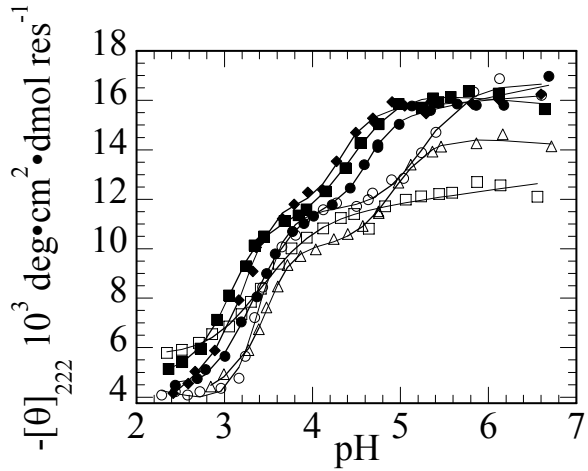

Supplement: pnas_101_34_12514__2.pdf [file pnas_101_34_12514__2.pdf]

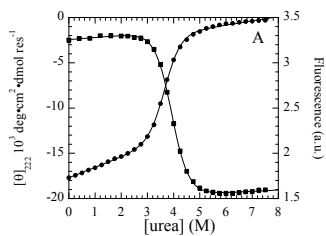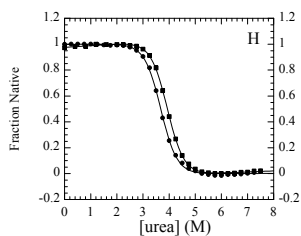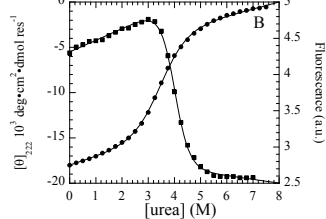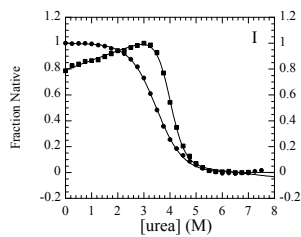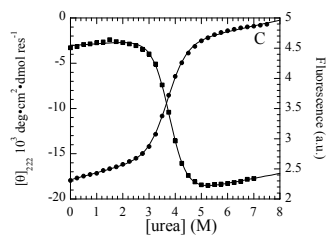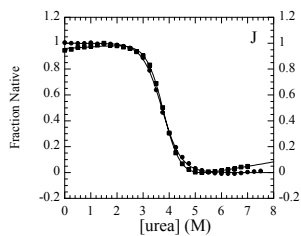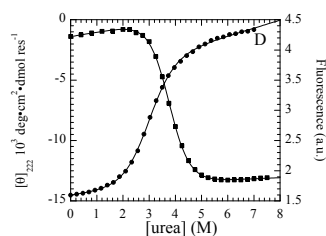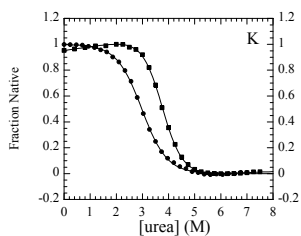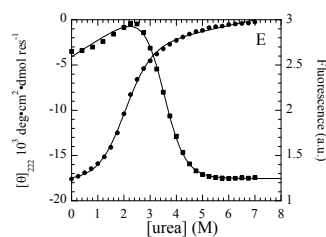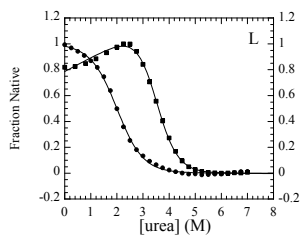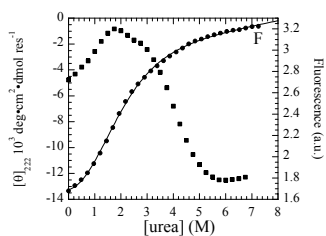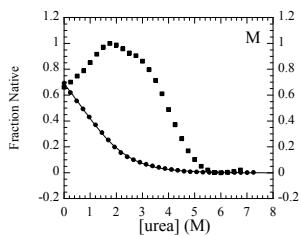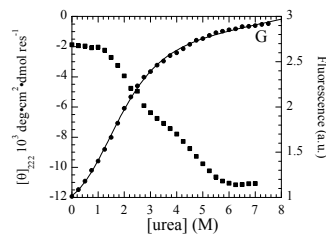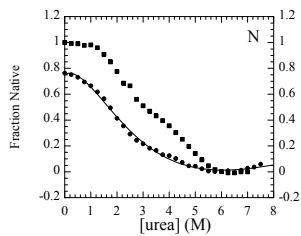

Supplement: pnas_101_34_12514__3.pdf [file pnas_101_34_12514__3.pdf]
